# Supplementary material
Source: publisher figshare collection journal article supplement (https://geolsoc.figshare.com/articles/dataset/_/3453302)
Supplement: Supplementary file 1 [file 1]

**Table 1:** Sericitization value inducing a decrease of 1% and 5% for K/Ar ages (AR parameter) for different terrestrial volcanism events, assuming an age difference between alteration and volcanism = 10% and An<sub>70</sub> for the chemistry of basaltic plagioclases. All these calculated values are hardly recognized during hand-picking, as well as in thin section study. Related stoichiometric index  $\gamma$  is also reported (see appendix for details).

| Trap<br>Volcanism | Age*<br>(Ma) | Range of Ca/K of<br>fresh plagioclase |             |               | Stoichio -<br>metric<br>index $\gamma$ | %Sericitization<br>required for<br>1% AR | %Sericitization<br>required for<br>5% AR | References                                                                                     |
|-------------------|--------------|---------------------------------------|-------------|---------------|----------------------------------------|------------------------------------------|------------------------------------------|------------------------------------------------------------------------------------------------|
|                   |              | Ca/K<br>min                           | Ca/K<br>max | Mean<br>value |                                        |                                          |                                          |                                                                                                |
| Kalkarindji       | 505          | 25                                    | 50          | 45            | 0.016                                  | 0.18%                                    | 1.55%                                    | <i>Evins et al., 2009</i>                                                                      |
| Viluy             | 370          | 10                                    | 50          | 35            | 0.02                                   | 0.25%                                    | 1.95%                                    | <i>Courtillot et al., 2010</i>                                                                 |
| Siberia           | 250          | 20                                    | 25          | 22            | 0.032                                  | 0.32%                                    | 3.1%                                     | <i>Hofmann, 1997</i>                                                                           |
| CAMP              | 199          | 20                                    | 70          | 45            | 0.016                                  | 0.18%                                    | 1.55%                                    | <i>Marzoli et al., 1999,<br/>2011 ; Hames et al.,<br/>2000 ; Verati et al.,<br/>2005, 2007</i> |
| Karoo             | 180          | 30                                    | 60          | 45            |                                        |                                          |                                          | <i>LeGall et al., 2002<br/>Jourdan et al., 2005,<br/>2008</i>                                  |
| Deccan            | 65           | 10                                    | 30          | 20            | 0.036                                  | 0.35%                                    | 3.4%                                     | <i>Courtillot et al., 2000<br/>Hofmann et al.,<br/>2000</i>                                    |
| Rajahmundry       | 65           | 100                                   | 300         | 200           | 0.0036                                 | 0.035%                                   | 0.35%                                    | <i>Knight et al., 2003</i>                                                                     |
| Ethiopian         | 30           | 40                                    | 165         | 100           | 0.007                                  | 0.08%                                    | 0.7%                                     | <i>Hofmann, 1997</i>                                                                           |

*\*These ages are based on the decay constant of Steiger and Jager, 1977 and are an approximate average of the age of the peak, not accounting for the duration of the magmatism. Note that a more recent calibration of the K decay constant exists (Renne et al., 2011) shifting these ages by about +1%, but that this does not affect the AR values reported in this table.*
