# Supplementary material
Source: publisher figshare collection journal article supplement (https://geolsoc.figshare.com/articles/dataset/_/3453302)
Supplement: Supplementary file 2 [file 1]

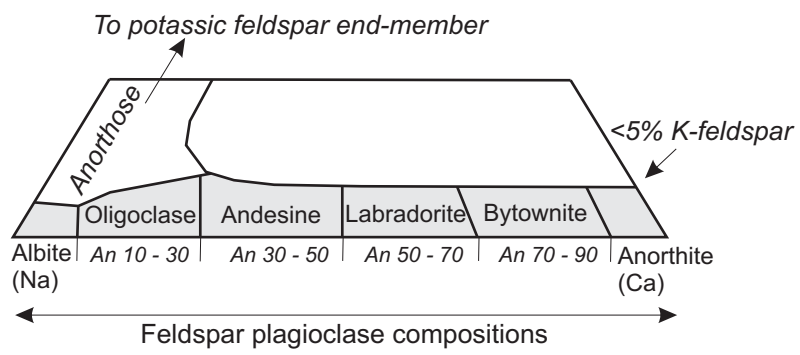

Figure A

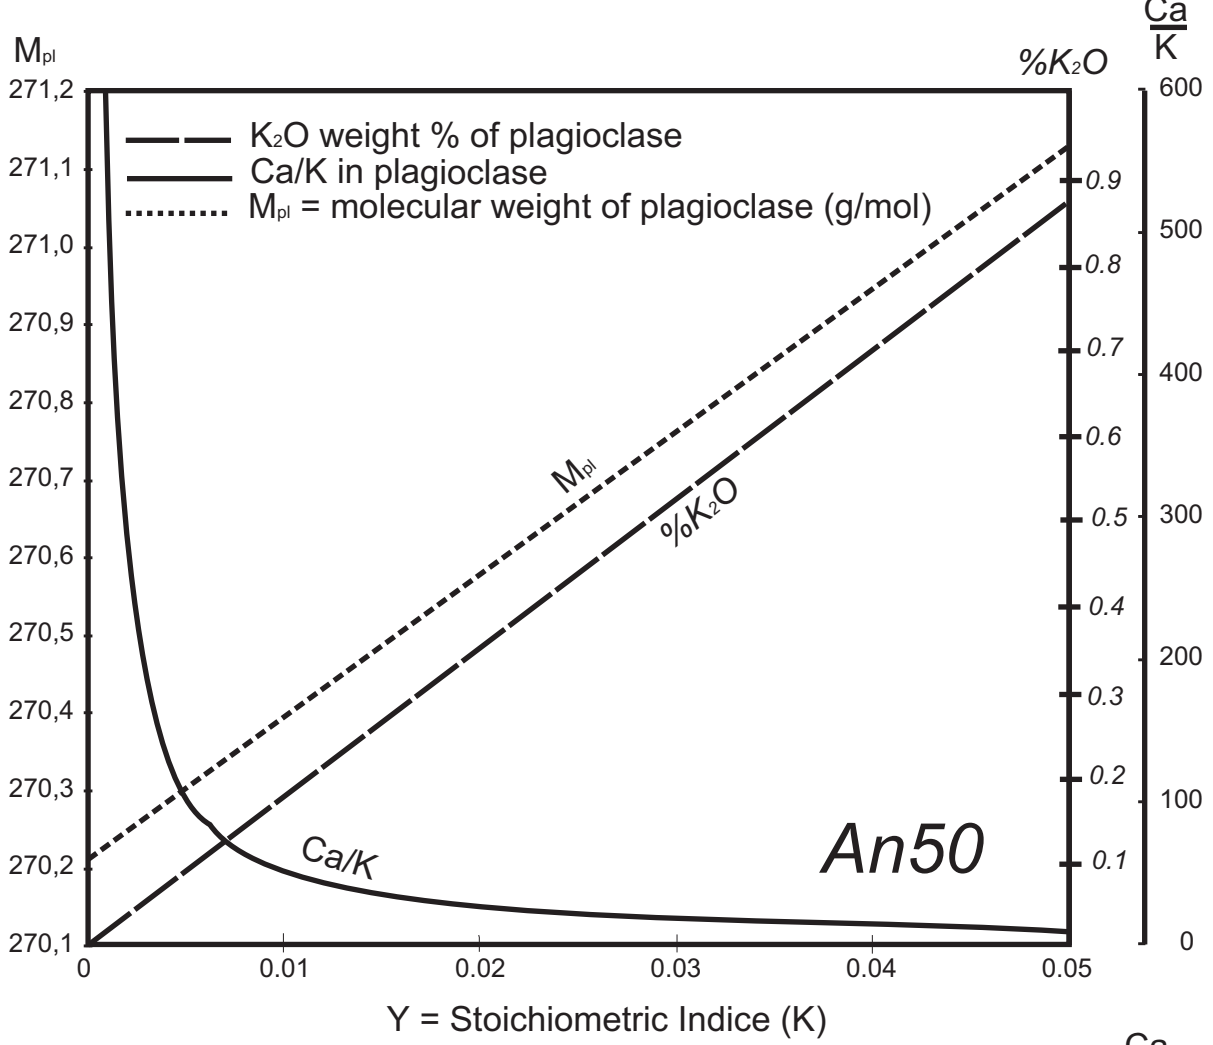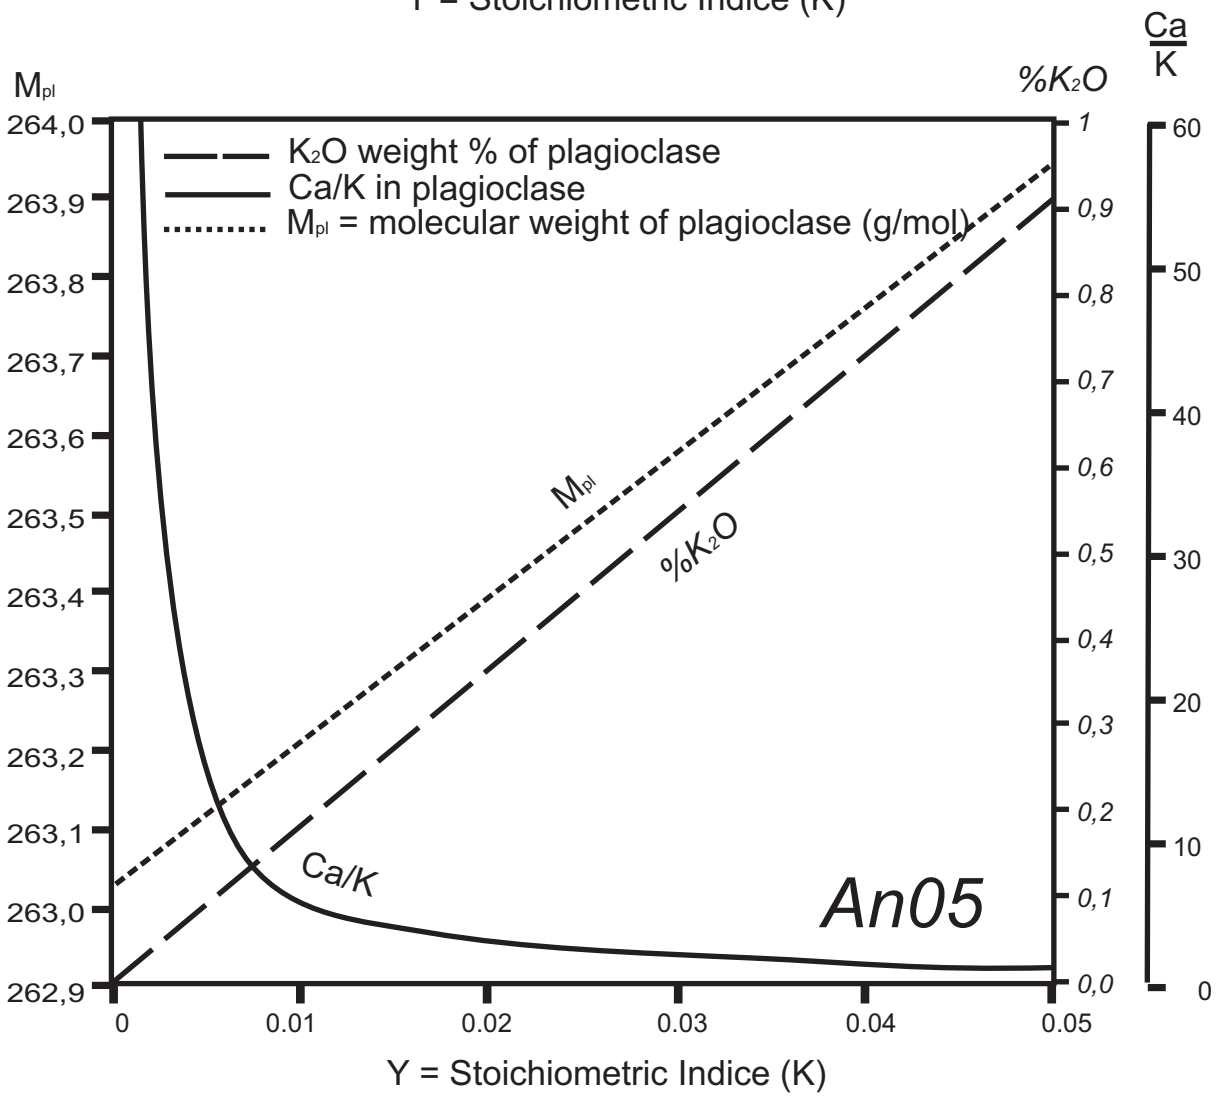

Figures B and C

# Experimental

# Theoretical

$$\left(\frac{Ca}{K}\right)_{mel} = \frac{\left(\frac{Ca}{K}\right)_{pl}}{\left(1 + \frac{XB}{(1-X)AC}\right)} = s$$

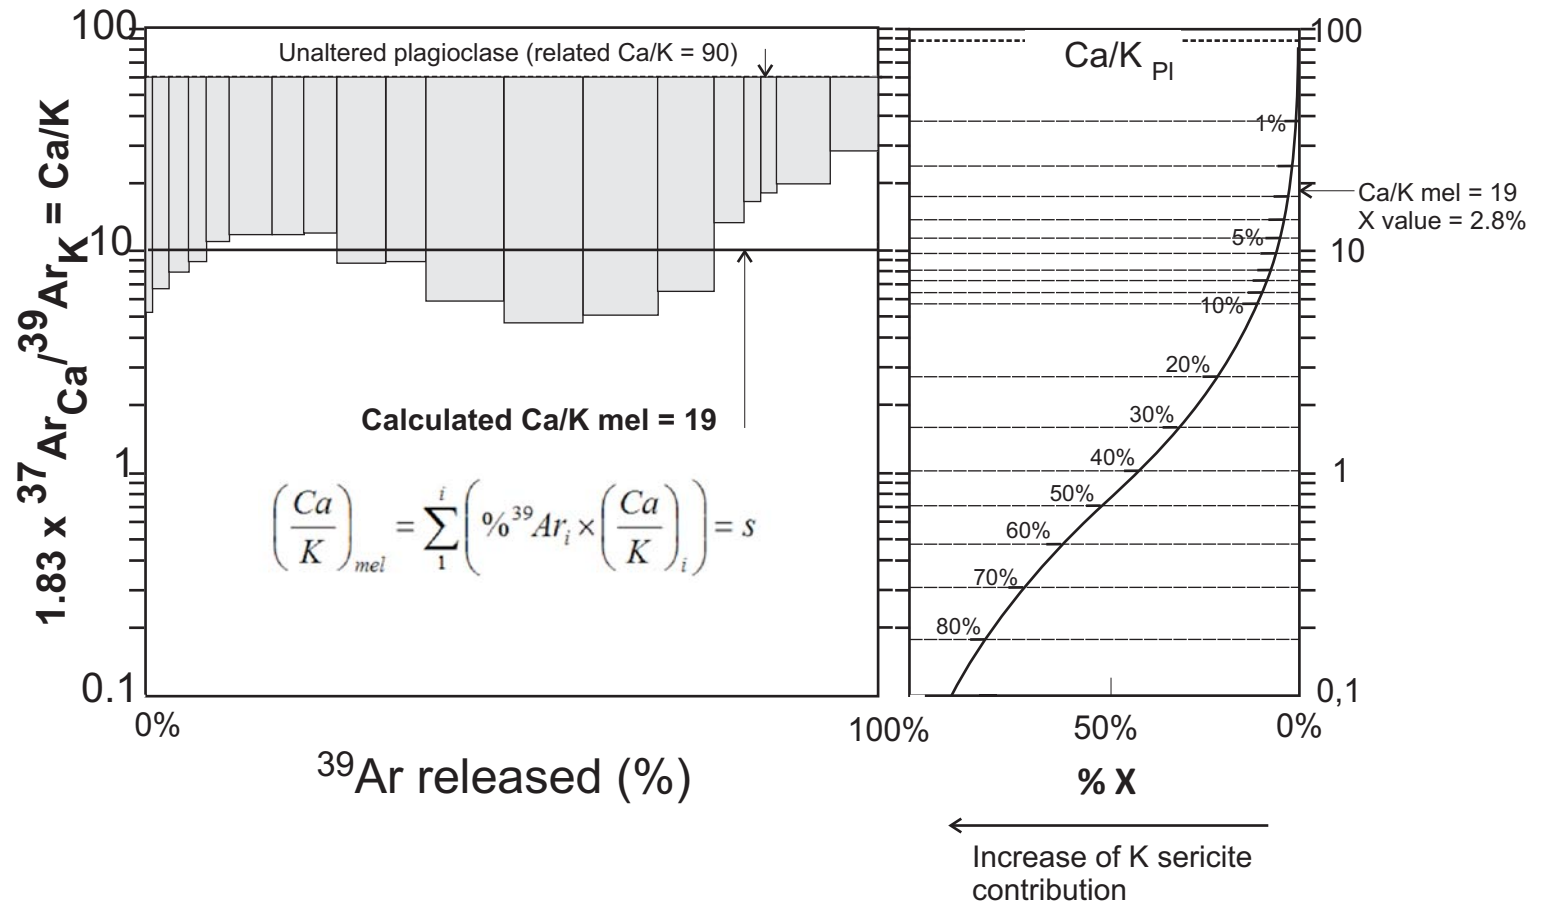

Figure D
