# Supplementary material
Source: publisher figshare collection journal article supplement (https://geolsoc.figshare.com/articles/dataset/_/3453302)
Supplement: Supplementary file 3 [file 1]

## Appendix

### 1 - Detailed equations for the determination of $^{40}\text{K}$ content in mineral

Considering  $M$  as the molecular weight (in g/mol)

- %K content expressed in g / g of mineral  $i$

$$\%K_{(g/g_i)} = \frac{(\%K_2O)_i \times M_K \times 2}{M_{K_2O}} \quad (A)$$

- %K content expressed in mole / mole of mineral  $i$

$$\%K_{(moles/moles_i)} = \frac{\%K_{(g/g)} \times M_i}{M_K} = \frac{(\%K_2O)_i \times M_i \times 2}{M_{K_2O}} \quad (B)$$

-  $^{40}\text{K}$  content determination using  $^{40}\text{K}/\text{K}$  ratio =  $0.01167 \times 10^{-2}$  (Garner at al., 1975) – Unit in mole / mole of mineral  $i$

$$\%^{40}\text{K}_{(moles/moles_i)} = \frac{(\%K_2O)_i \times M_i \times 2}{M_{K_2O}} \times (0.01167 \times 10^{-2}) \quad (C)$$

-  $^{40}\text{K}$  content expressed in mole / mole of the mixture, with  $X$  = % sericite in the melange

$$\%^{40}\text{K}_{(moles/moles_{mel})} = X \%^{40}\text{K}_{(moles/moles_i)} \quad (D)$$

- Numerical application for the  $^{40}\text{K}_{\text{Ser}}$

$M_{\text{Ser}}$  = Molecular Weight of empiric sericite ( $\text{KAl}_3\text{Si}_3\text{O}_{10}(\text{OH})_2$ ) = 398.31 g/mol

$M_{\text{K}_2\text{O}}$  = Molecular Weight of  $\text{K}_2\text{O}$  = 94.2 g/mol

$M_K$  = Molecular Weight of K = 39.1 g/mol

$^{40}\text{K}/\text{K}$  =  $0.01167 \times 10^{-2}$

$\%\text{K}_2\text{O}$  = 11.82 %;  $\%\text{K}$  = 9.82%

Equation A :  $\%K_{(g/g_{\text{ser}})} = 0.098 \%$

Equation B :  $\%K_{(moles/moles_{\text{ser}})} = 0.999 \%$

Equation C :  $\%^{40}\text{K}_{(moles/moles_{\text{ser}})} = 1.166 \times 10^{-4} \%$

Note that "sericite" term is used as a general description for fine-grained phyllosilicate replacement phases. Sericite does not have a fixed composition and can be reported as paragonite, illite, or hydromuscovite. The majority of sericite is K-bearing, but clearly not

[fixed exactly at 11.82% K<sub>2</sub>O as used in the present model \(pure muscovite\). It is a adjustable parameter in the model which can be given by in situ microprobe analysis.](#)

- Numerical application for the <sup>40</sup>K<sub>Pl</sub>

Unlike the sericite, which has a fixed chemical composition, plagioclases have various Ca, Na and thus K contents. Thus, we have to determine the %K<sub>2</sub>O in plagioclase regarding their various Na and Ca contents.

Structural formula of plagioclases can be expressed as:

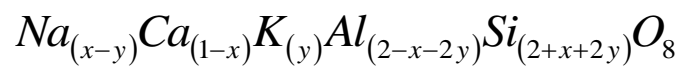

For each x and y value, i.e for each plagioclase composition ranging from pure end-member of albite (An<sub>0</sub>) to anorthite (An<sub>100</sub>), we can calculate the proportion of K related to those of Ca and Na. The K content in common plagioclase rarely exceeds 5% of the K-rich end-member (see Figure A). We can realistically consider that the stoichiometric indice y is ranging from 0 to 0.05.

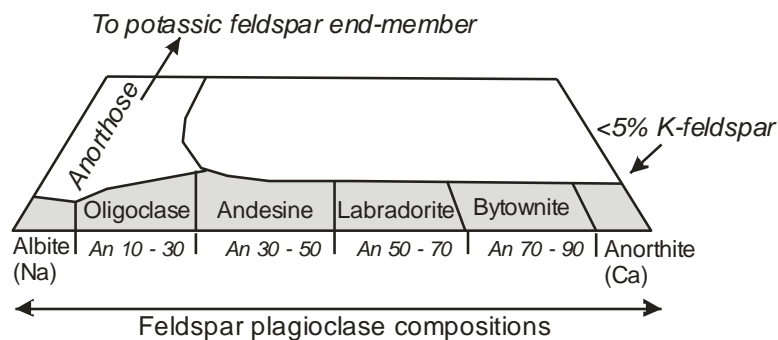

Figure A: Classification of plagioclases

Thus, we can model various composition of plagioclases, based on their structural formula which gives us the related (1) molecular weight, (2) the %K<sub>2</sub>O and (2) the Ca/K of the

62 plagioclase (see table A, figures B & C, and see Part. 3 of appendix for detailed  
 63 explanations). For example, y values ranging from 0.001 to 0.05 implies that related K<sub>2</sub>O  
 64 contents for classical plagioclases range from 0.0017% to 0.87% using an An<sub>50</sub> value for  
 65 this plagioclase (Figure B). For an An<sub>05</sub>, calibrated values are also shown in Figure C.  
 66 By knowing the molecular weight and related %wt K<sub>2</sub>O for all theoretical plagioclases, we  
 67 can apply the previous equations A, B, and C (Table A).

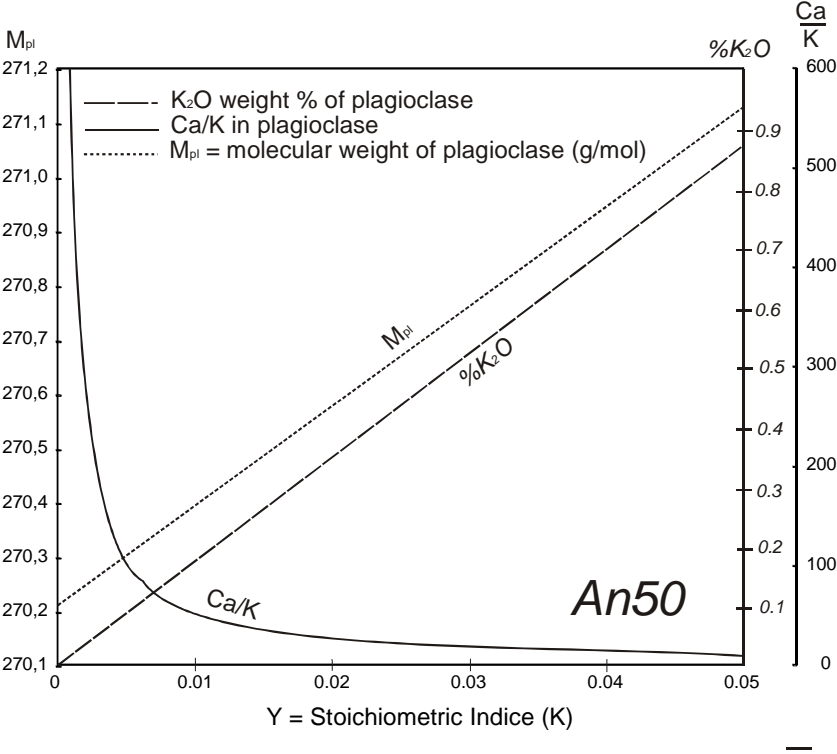

68

69 Figure B: Related molecular weight, % wt K<sub>2</sub>O and Ca/K values in the case of An<sub>50</sub>

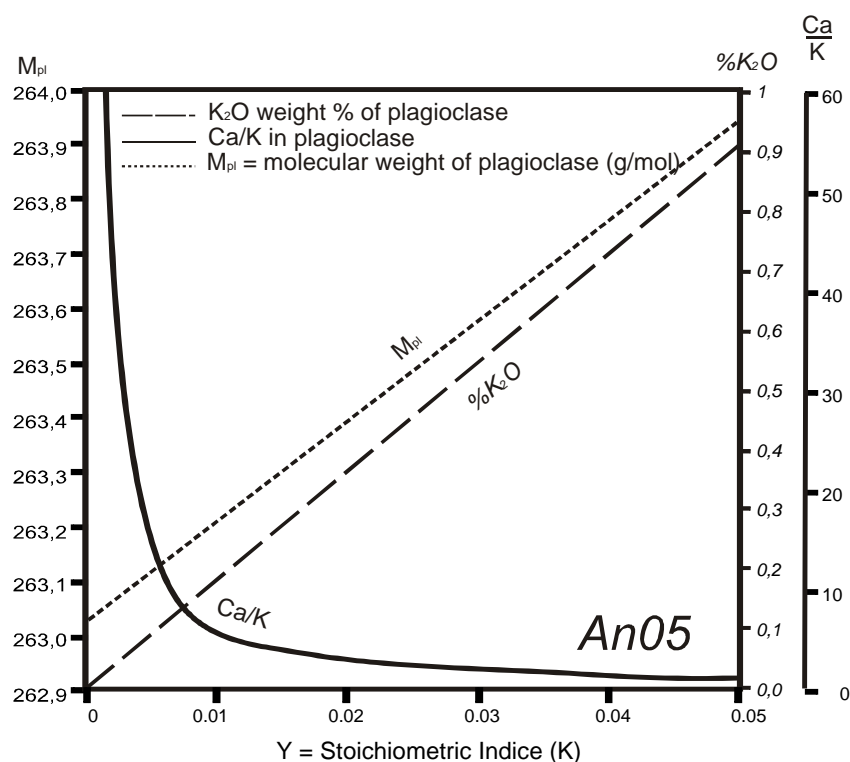

Figure C: Related molecular weight, % wt K<sub>2</sub>O and Ca/K values in the case of An<sub>05</sub>

| PLAGIOCLASE               | Example #1<br>K-rich An <sub>50</sub>                                                      | Example #2<br>K-poor An <sub>50</sub>                                                            | Example #3<br>Classical An <sub>50</sub>                                                      |
|---------------------------|--------------------------------------------------------------------------------------------|--------------------------------------------------------------------------------------------------|-----------------------------------------------------------------------------------------------|
| Structural formula        | K <sub>0.05</sub> Na <sub>0.45</sub> Ca <sub>0.5</sub> Si <sub>2.6</sub> Al <sub>1.4</sub> | K <sub>0.001</sub> Na <sub>0.499</sub> Ca <sub>0.5</sub> Si <sub>2.502</sub> Al <sub>1.498</sub> | K <sub>0.01</sub> Na <sub>0.490</sub> Ca <sub>0.5</sub> Si <sub>2.52</sub> Al <sub>1.48</sub> |
| y (stoichiometric indice) | 0.05                                                                                       | 0.001                                                                                            | 0.01                                                                                          |
| %wt K <sub>2</sub> O      | 0.869                                                                                      | 0.017                                                                                            | 0.174                                                                                         |
| Molecular weight in g/mol | 271.13                                                                                     | 270.23                                                                                           | 270.40                                                                                        |
| Related mass ratio Ca/K   | 10                                                                                         | 500                                                                                              | 50                                                                                            |
| Equation A                | 0.72140                                                                                    | 0.01411                                                                                          | 0.14444                                                                                       |
| Equation B                | 5.0024                                                                                     | 0.0975                                                                                           | 0.9989                                                                                        |
| Equation C                | 5.84 e <sup>-4</sup>                                                                       | 1.14 e <sup>-5</sup>                                                                             | 1.17 e <sup>-4</sup>                                                                          |

Table A: Some examples of calculated values for plagioclases An<sub>50</sub>  
Equations A, B & C are applied using: M<sub>K<sub>2</sub>O</sub> = molecular weight of K<sub>2</sub>O = 94.2 g/mol; M<sub>k</sub> = molecular weight of K = 39.1 g/mol; <sup>40</sup>K/K = 0.01167 x 10<sup>-2</sup> (Garner et al., 1975)

2 - Detailed equations for the determination of  $\left(\frac{{}^{40}K_{Ser}}{{}^{40}K_{Tot}}\right)$  and  $\left(\frac{{}^{40}K_{Pl}}{{}^{40}K_{Tot}}\right)$  in the mixture

80 Using Equation (D) and Equation (1)  $^{40}K_{tot} = (1 - X)^{40}K_{Pl} + X^{40}K_{Ser}$ , we determine the two  
 81 ratios for the mixture as following :

$$\begin{aligned} \left( \frac{^{40}K_{Ser}}{^{40}K_{Tot}} \right) = & \frac{X \times \left( \frac{\%K_2O_{Ser} \times M_{Ser} \times 2 \times 0.0001167}{M_{K_2O}} \right)}{(1 - X) \times \left( \frac{\%K_2O_{Pl} \times M_{Pl} \times 2 \times 0.0001167}{M_{K_2O}} \right) + X \times \left( \frac{\%K_2O_{Ser} \times M_{Ser} \times 2 \times 0.0001167}{M_{K_2O}} \right)} = \\ & \frac{X \times (\%K_2O_{Ser} \times M_{Ser})}{(1 - X) \times (\%K_2O_{Pl} \times M_{Pl}) + X \times (\%K_2O_{Ser} \times M_{Ser})} \quad (E) \end{aligned}$$

83  
 84 and also :

$$\left( \frac{^{40}K_{Pl}}{^{40}K_{Tot}} \right) = \frac{(1 - X) \times (\%K_2O_{Pl} \times M_{Pl})}{(1 - X) \times (\%K_2O_{Pl} \times M_{Pl}) + X \times (\%K_2O_{Ser} \times M_{Ser})} \quad (F)$$

86  
 87

### 88 **3 – Relationship between %wt K<sub>2</sub>O, %wt CaO and Ca/K in plagioclase**

89 It is obvious that these three chemical parameters are not independent in plagioclase, such  
 90 as shown in Figures B and C. In equation (E) and (F), the Ca/K ratio is missing, although it  
 91 is very important in Ar-Ar dating, because it is related to the  $^{37}Ar_{Ca}/^{39}Ar_K$  ratio measured  
 92 during degassing process of analyzed minerals.

93 If we apply equations (A) and (B) for Ca in plagioclase:

94

$$\%Ca_{(g/g_{Pl})} = \frac{(\%CaO)_{Pl} \times M_{Ca}}{M_{CaO}} \quad \text{and} \quad \%Ca_{(mol/mol_{Pl})} = \frac{(\%CaO)_{Pl} \times M_{Pl}}{M_{CaO}}$$

96

97 We can determine the (Ca/K)<sub>1</sub> mass ratio or (Ca/K)<sub>2</sub> molar ratio as following :

$$\left( \frac{Ca}{K} \right)_1 = \frac{(\%CaO)_{Pl} \times M_{Ca}}{M_{CaO}} \times \frac{M_{K_2O}}{2 \times (\%K_2O)_{Pl} \times M_K} \approx 0.8606 \left( \frac{\%CaO}{\%K_2O} \right)_{Pl}$$

98

$$\left(\frac{Ca}{K}\right)_2 = \frac{(\%CaO)_{Pl} \times M_{Pl}}{M_{CaO}} \times \frac{M_{K_2O}}{2 \times (\%K_2O)_{Pl} \times M_{Pl}} = \frac{(\%CaO)_{Pl} \times M_{K_2O}}{2 \times M_{CaO} (\%K_2O)_{Pl}} \approx 0.8387 \left(\frac{\%CaO}{\%K_2O}\right)_{Pl}$$

Consequently, we can write taking into account the molar ratio:

$$(\%K_2O)_{Pl} = \frac{M_{K_2O}}{2M_{CaO}} \times (\%CaO)_{Pl} \times \left(\frac{K}{Ca}\right)_{Pl} \quad (G)$$

If we use equation (G) in equations (E) and (F), we obtain the final equations used in our model:

$$\left(\frac{{}^{40}K_{Ser}}{{}^{40}K_{Tot}}\right) = \frac{X(\%K_2O_{Ser} \times M_{Ser})}{(1-X) \left( \frac{M_{K_2O}}{2M_{CaO}} \times (\%CaO)_{Pl} \times \left(\frac{K}{Ca}\right)_{Pl} \times M_{Pl} \right) + X(\%K_2O_{Ser} \times M_{Ser})} \quad (H)$$

$$\left(\frac{{}^{40}K_{Pl}}{{}^{40}K_{Tot}}\right) = \frac{(1-X) \left( \frac{M_{K_2O}}{2M_{CaO}} \times (\%CaO)_{Pl} \times \left(\frac{K}{Ca}\right)_{Pl} \times M_{Pl} \right)}{(1-X) \left( \frac{M_{K_2O}}{2M_{CaO}} \times (\%CaO)_{Pl} \times \left(\frac{K}{Ca}\right)_{Pl} \times M_{Pl} \right) + X(\%K_2O_{Ser} \times M_{Ser})} \quad (I)$$

The %wt CaO for plagioclase is related to stoichiometric indice of Ca in the structural formula. For our model mixing, we fixed first on An<sub>70</sub>, of An<sub>10</sub>, or An<sub>30</sub>... for a given K content (y stoichiometric indice) and we calculated the related %wt CaO, Ca/K ratio and thus the induced molecular weight of the considered plagioclase (example in table A). We input these values in equations (H) and (I).

#### 4- Determination of the sericitization value (X) in <sup>40</sup>Ar/<sup>39</sup>Ar spectra

With the <sup>37</sup>Ar<sub>Ca</sub>/<sup>39</sup>Ar<sub>K</sub> data from a real experiment, we approximate the Ca/K ratio of the mélange (Ca/K)<sub>mel</sub> respect to Ca/K and related %<sup>39</sup>Ar of each temperature steps :

$$\left(\frac{Ca}{K}\right)_{mel} = \sum_1^i \left( \%^{39}Ar_i \times \left(\frac{Ca}{K}\right)_i \right) = s \quad (J)$$

with i = number of steps

and  $Ca/K = 1.83 \times {}^{37}Ar_{Ca}/{}^{39}Ar_K$  (after McMaster reactor facilities)

We can also define the theoretical value  $(Ca/K)_{mel}$  considering the  $(Ca/K)_{Pl}$  of the unaltered plagioclase:

$$\left(\frac{Ca}{K}\right)_{mel} = \frac{Ca_{Pl}}{K_{Pl} + K_{Ser}} = \frac{\left(\frac{Ca}{K}\right)_{Pl}}{\left(1 + \frac{K_{Ser}}{K_{Pl}}\right)} \quad (K)$$

With Equations (2) and (3), we can replace  $K_{Ser}/K_{Pl}$  with :

$$\left(\frac{Ca}{K}\right)_{mel} = \frac{\left(\frac{Ca}{K}\right)_{Pl}}{\left(1 + \frac{XB}{(1-X)AC}\right)} = s \quad (L)$$

$$\text{With } C = (\%CaO)_{Pl} \times \left(\frac{K}{Ca}\right)_{Pl} \times M_{Pl}$$

And with known value =  $Ca/K$  of the fresh plagioclase

Finally, we obtain:

$$X = \frac{1}{\left(\frac{B}{\gamma AC}\right) + 1} \quad \text{with} \quad \gamma = \frac{\left(\frac{Ca}{K}\right)_{Pl}}{\sum_i^i \left( \% {}^{39}Ar_i \times \left(\frac{Ca}{K}\right)_i \right)} - 1 = \left( \frac{\left(\frac{Ca}{K}\right)_{Pl}}{s} - 1 \right) \quad (M)$$

We use these equations for  ${}^{40}Ar/{}^{39}Ar$  data reported in figures 6 and 7.

For the CAMP plagioclase (figure 6), we find a degree of sericitization of ~3% (see figure D). For Karoo sample, we find a slight sericitization of 0.16% (figure 7).

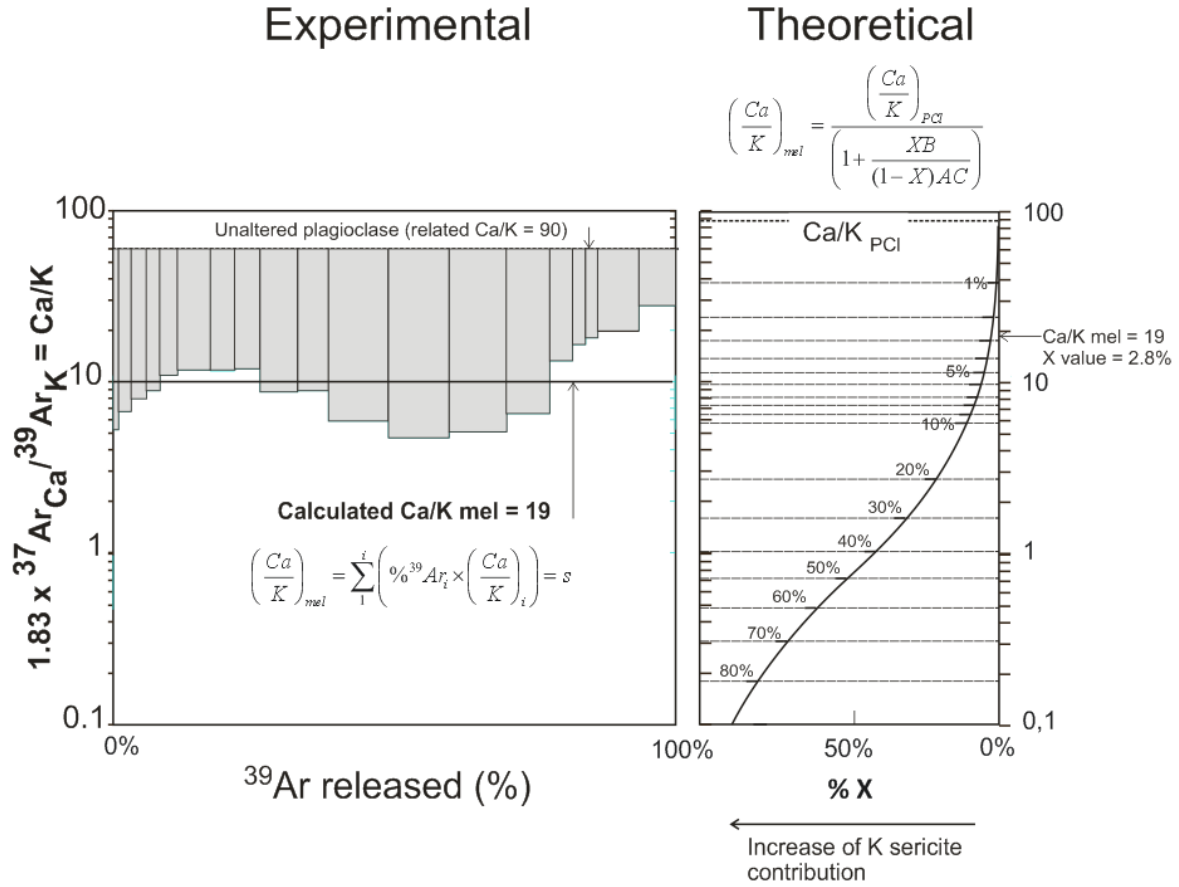

Figure D: Ca/K spectrum (left) of plagioclases from the Central Atlantic Magmatic Province; and theoretical  $(Ca/K)_{mel}$  using equation K (right). The  $(Ca/K)$  of the melange is determined using equation (J) and corresponds to 2.8% of sericitization.

### 5- Estimate of the age $t'$ of the alteration in Ar-Ar spectra

Using equation (1) in the text, and considering previous X value in equations (2) and (3), we can write for  $t'$ :

$$t' = \frac{1}{\lambda} \ln \left[ 1 + \left( \frac{{}^{40}K_{tot}}{{}^{40}K_{Ser}} \right) (e^{\lambda t_{mel}} - 1) - \left( \frac{{}^{40}K_{Pl}}{{}^{40}K_{Ser}} \right) (e^{\lambda t} - 1) \right] \quad (N)$$

with  $t$  = age of the unaltered plagioclase and  $t_{mel}$  = age of the mélange and thus the total gas age during the entire degassing process (for  $i$  temperature steps):

145 
$$t_{mel} = \sum_1^i \left( \% {}^{39}\text{Ar}_i \times t_i \right) \quad (\text{O})$$

146 For CAMP and Karoo plagioclases, we find an age of sericitization of 176 My and 172 My,  
147 respectively.

148
